# Supplementary material for: Analysis of Polyphenolic Compounds in Water-Based Extracts of Vicia faba L.: A Potential Innovative Source of Nutraceutical Ingredients
Source: MDPI journal article supplement (doi:10.3390/antiox11122453), 2022-12-12
Supplement: s1 [file s1]

## Supplementary Materials:

**Table S1.** Gastrointestinal digestion solutions.

| Salt solution                                     | Stock concentration (mol/L) | SSF (pH 7)                              |                                             | SGF (pH 3)                              |                                     | SIF (pH 7)                              |                                     |
|---------------------------------------------------|-----------------------------|-----------------------------------------|---------------------------------------------|-----------------------------------------|-------------------------------------|-----------------------------------------|-------------------------------------|
|                                                   |                             | mL of Stock added to prepare 0.4 L (mL) | Final salt concentration in sample (mmol/L) | mL of Stock added to prepare 0.4 L (mL) | Final salt conc. in sample (mmol/L) | mL of Stock added to prepare 0.4 L (mL) | Final salt conc. in sample (mmol/L) |
| KCl                                               | 0.5                         | 15.1                                    | 15.1                                        | 6.9                                     | 6.9                                 | 6.8                                     | 6.8                                 |
| KH <sub>2</sub> PO <sub>4</sub>                   | 0.5                         | 3.7                                     | 1.35                                        | 0.9                                     | 0.9                                 | 0.8                                     | 0.8                                 |
| NaHCO <sub>3</sub>                                | 1                           | 6.8                                     | 13.68                                       | 12.5                                    | 25                                  | 42.5                                    | 85                                  |
| NaCl                                              | 2                           | -                                       | -                                           | 11.8                                    | 47.2                                | 9.6                                     | 38.4                                |
| MgCl <sub>2</sub> (H <sub>2</sub> O) <sub>6</sub> | 0.15                        | 0.5                                     | 0.15                                        | 0.4                                     | 0.12                                | 1.1                                     | 0.33                                |
| NH <sub>4</sub> (CO <sub>3</sub> ) <sub>2</sub>   | 0.5                         | 0.06                                    | 0.06                                        | 0.5                                     | 0.5                                 | -                                       | -                                   |

SSF: simulated salivary fluid; SGF: simulated gastric fluid gastric; SIF: simulated intestinal fluid.

**Table S2.** Bioaccessibility measured in the control capsules

| Samples                    | TPC mg GAE/g $\pm$ SD |
|----------------------------|-----------------------|
| Not digested cellulose     | 0.1 $\pm$ 0.00        |
| <b>CT</b>                  |                       |
| <i>Digestion Stage</i>     |                       |
| Intestinal stage           | N.D.                  |
| Pronase stage              | N.D.                  |
| Viscozyme L stage          | N.D.                  |
| <i>Total colonic stage</i> | N.D.                  |

N.D.: not detected; CT: control capsules; TPC: total phenolic compounds.

**Table S3.** Correlation between DPPH and ABTS tests and data obtained by the Folin-Ciocolteu assay.

| Assay | Intestinal Stage | Pronase Stage | Viscozyme L. Stage |
|-------|------------------|---------------|--------------------|
|       | $R^2$            | $R^2$         | $R^2$              |
| DPPH  | 0.97             | 0.98          | 0.97               |
| ABTS  | 0.97             | 0.97          | 0.98               |

The correlation coefficients were evaluated by using Pearson's method.

**Table S4.** Antioxidant capacity measured by DPPH and ABTS methods in the control capsules

| <b>Samples</b>             | <b>DPPH mmol/kg <math>\pm</math> SD</b> | <b>ABTS mmol/kg <math>\pm</math> SD</b> |
|----------------------------|-----------------------------------------|-----------------------------------------|
| Not digested cellulose     | <b>0.2 <math>\pm</math> 0.0</b>         | 0.2 $\pm$ 0.0                           |
|                            | <b>CT</b>                               | <b>CT</b>                               |
| <i>Digestion Stage</i>     |                                         |                                         |
| Intestinal stage           | 0.1 $\pm$ 0.0                           | 0.1 $\pm$ 0.0                           |
| Pronase stage              | N.D.                                    | N.D.                                    |
| Viscozyme L stage          | N.D.                                    | N.D.                                    |
| <i>Total colonic stage</i> | N.D.                                    | N.D.                                    |

N.D.: not detected; CT: control capsules.
